# Supplementary material for: Bacteriophage Therapy for Critical Infections Related to Cardiothoracic Surgery
Source: PubMed Central journal article supplement (PMC7277081; doi:10.3390/antibiotics9050232), 2020-05-05
Supplement: antibiotics-09-00232-s001.pdf [file antibiotics-09-00232-s001.pdf]

1 Supplementary materials

2 **Bacteriophage therapy for critical infections related to**  
 3 **cardiothoracic surgery**

4 Evgenii Rubalskii<sup>1,2\*</sup>, Stefan Ruemke<sup>1,2\*</sup>, Christina Salmoukas<sup>1,2</sup>, Erin C. Boyle<sup>1</sup>, Gregor Warnecke<sup>1</sup>,  
 5 Igor Tudorache<sup>1</sup>, Malakh Shrestha<sup>1</sup>, Jan Schmitto<sup>1</sup>, Andreas Martens<sup>1</sup>, Sebastian V. Rojas<sup>1</sup>, Stefan  
 6 Ziesing<sup>3</sup>, Svetlana Bochkareva<sup>4</sup>, Christian Kuehn<sup>1,2,5,6#</sup>, Axel Haverich<sup>1,2,5,6#</sup>

7  
 8 Supplementary Table S1 - Patient 1

| Date        | sCRP.<br>(mg/L) | Leukocytes.<br>( $\times 10^9/L$ ) | Body temperature.<br>( $^{\circ}C$ ) | sPCT.<br>( $\mu g/L$ ) |
|-------------|-----------------|------------------------------------|--------------------------------------|------------------------|
| 20.08.2015  | 79              | 9.00                               |                                      |                        |
| 21.08.2015  | 80              | 7.40                               |                                      |                        |
| 22.08.2015  | 74              | 7.00                               |                                      |                        |
| 23.08.2015  | 67              | 6.70                               |                                      |                        |
| 24.08.2015  | 55              | 6.20                               |                                      |                        |
| 25.08.2015  | 52              | 5.30                               |                                      |                        |
| 26.08.2015  | 45              | 5.50                               |                                      |                        |
| 27.08.2015  | 42              | 5.50                               | 37                                   | 0.1                    |
| 28.08.2015  | 54              | 6.30                               |                                      |                        |
| 29.08.2015  | 53              | 5.10                               |                                      |                        |
| 30.08.2015  | 54              | 6.10                               |                                      |                        |
| 31.08.2015  | 86              | 4.90                               |                                      |                        |
| 01.09.2015  | 99              | 5.20                               |                                      |                        |
| 02.09.2015  | 122             | 4.50                               |                                      |                        |
| 03.09.2015  | 148             | 5.70                               |                                      | 0.4                    |
| 04.09.2015  | 169             | 4.00                               |                                      |                        |
| 05.09.2015  | 154             | 4.90                               |                                      |                        |
| 06.09.2015  | 80              | 6.80                               |                                      |                        |
| 07.09.2015  | 81              | 6.30                               |                                      |                        |
| 08.09.2015  | 94              | 6.50                               |                                      |                        |
| 09.09.2015  | 88              | 6.70                               |                                      |                        |
| 10.09.2015  | 86.2            | 7.00                               | 37.3                                 | 0.2                    |
| 11.09.2015  | 120             | 12.40                              | 37.4                                 | 1.6                    |
| 12.09.2015* | 228             | 14.20                              | 37.6                                 | 1.9                    |
| 13.09.2015  | 258             | 9.80                               | 37.9                                 | 1.6                    |
| 14.09.2015  | 250             | 9.00                               | 37.6                                 | 1.2                    |
| 15.09.2015  | 218             | 7.20                               | 36.6                                 | 0.4                    |
| 16.09.2015  | 102             | 6.00                               | 37.2                                 | 0.3                    |
| 17.09.2015  | 61              | 8.10                               | 36.7                                 | 0.2                    |
| 18.09.2015  | 63              | 4.90                               | 36.3                                 | 0.1                    |

|            |    |      |      |     |
|------------|----|------|------|-----|
| 19.09.2015 | 41 | 8.80 | 37.2 | 0.1 |
| 20.09.2015 | 32 | 5.80 | 36.2 | 0.1 |
| 21.09.2015 | 36 | 9.10 | 37   | 0.1 |

- 9  Red color indicates days of phage therapy
- 10 \*Left-sided re-thoracotomy with suturing of a broncho-pleural fistula
- 11

12  
13

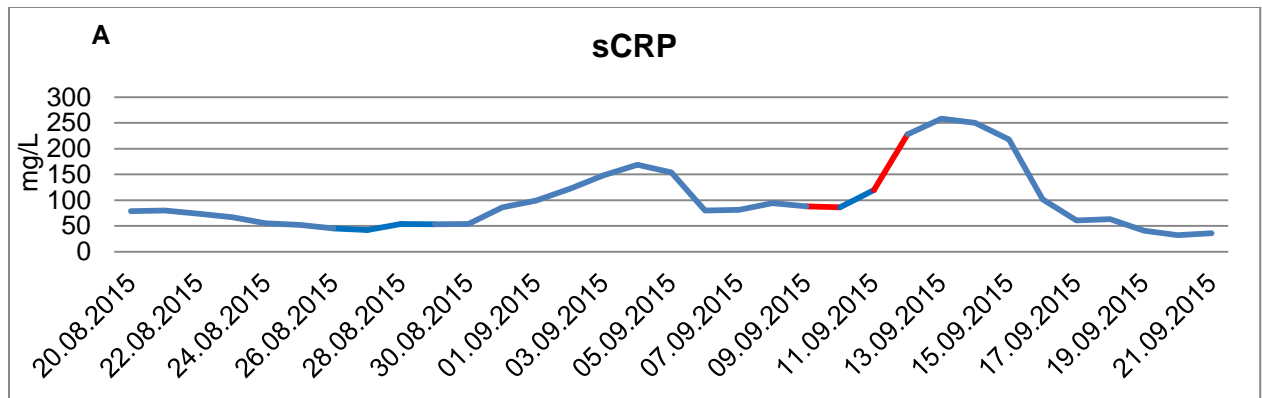

14  
15

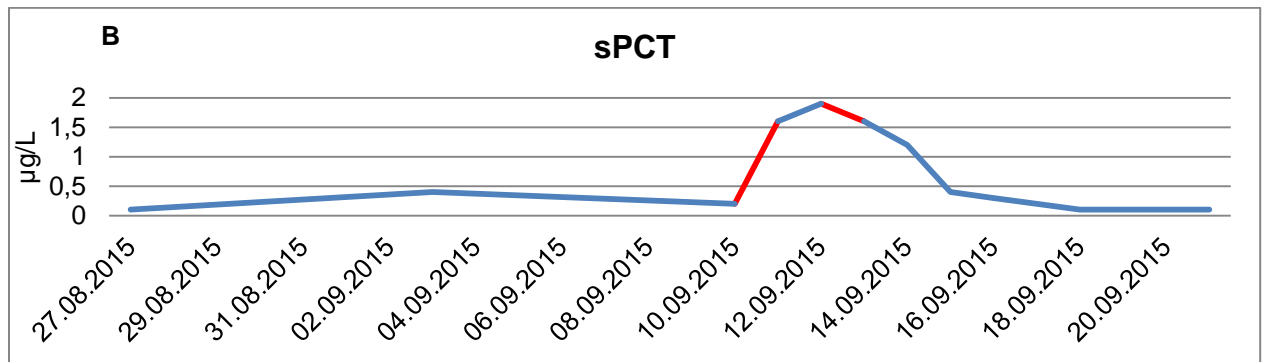

16  
17

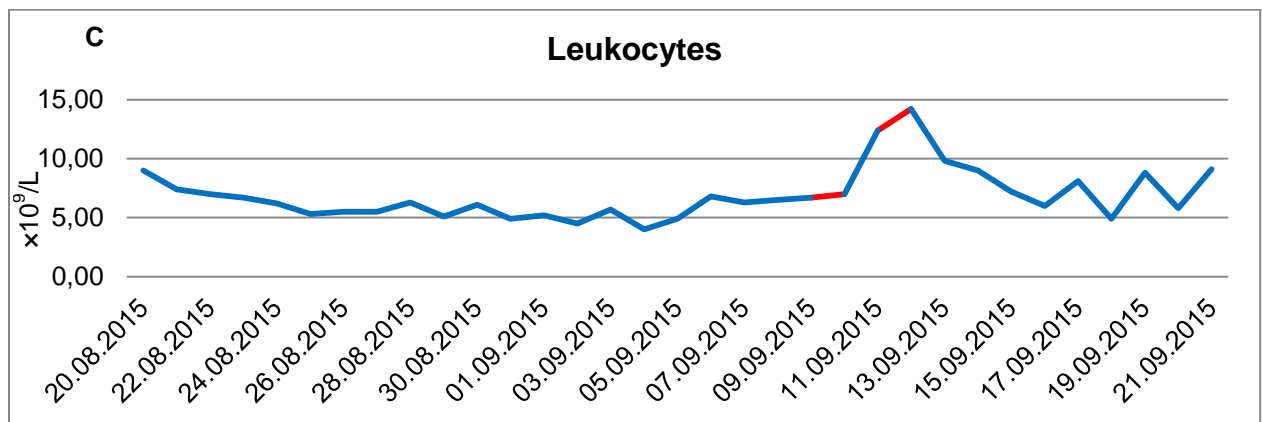

18  
19

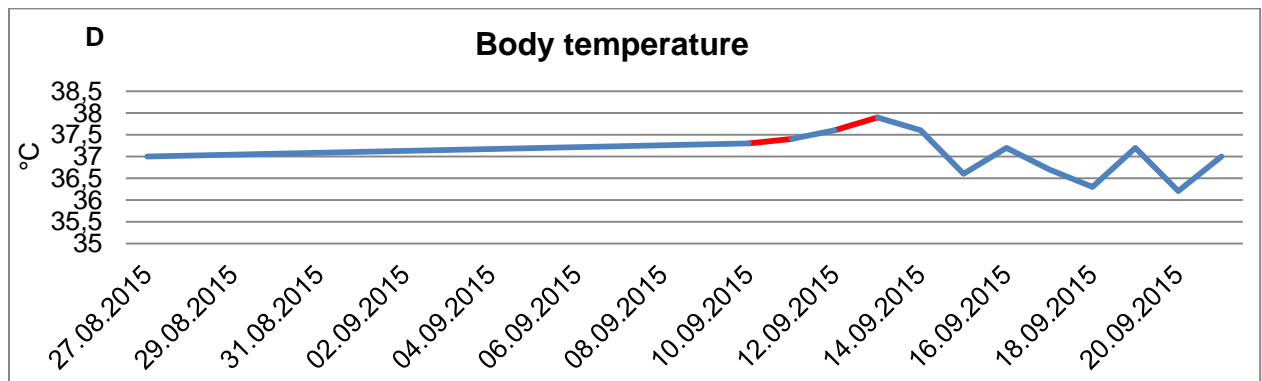

Supplementary Figure S1 – Patient 1

20 Supplementary Table S2 - Patient 2

| Date       | sCRP<br>(mg/L) | Leukocytes<br>( $\times 10^9/L$ ) | Body temperature<br>( $^{\circ}C$ ) | sPCT<br>( $\mu g/L$ ) |
|------------|----------------|-----------------------------------|-------------------------------------|-----------------------|
| 23.08.2016 | 4              | 34.90                             | 36                                  | 2.1                   |
| 24.08.2016 | 5              | 24.50                             | 36                                  | 2.2                   |
| 25.08.2016 | 7              | 23.90                             | 36                                  | 3                     |
| 26.08.2016 | 17             | 24.20                             | 36.5                                | 3.3                   |
| 27.08.2016 | 9              | 22.80                             | 36                                  | 3                     |
| 28.08.2016 | 21             | 22.80                             | 36                                  | 2.7                   |
| 29.08.2016 | 49             | 21.20                             | 36                                  | 6.3                   |
| 30.08.2016 | 83             | 16.2                              | 36.6                                | 5.8                   |
| 31.08.2016 | 116            | 15                                | 36                                  | 6.3                   |
| 01.09.2016 | 76             | 13.7                              | 36.5                                | 4                     |
| 02.09.2016 | 55             | 11.3                              | 35.8                                | 2.8                   |
| 03.09.2016 | 42             | 8.5                               | 35.5                                | 2                     |
| 04.09.2016 | 24             | 10                                | 36.5                                | 2                     |
| 05.09.2016 | 20             | 9.9                               | 37                                  | 1.9                   |
| 06.09.2016 | 18             | 12.5                              | 36.1                                | af                    |
| 07.09.2016 | 21             | 16.3                              | 37.2                                | 2.1                   |
| 08.09.2016 | 32             | 13.4                              | 37                                  | 2.3                   |

21  Red color shows days of phage therapy

22

23

24

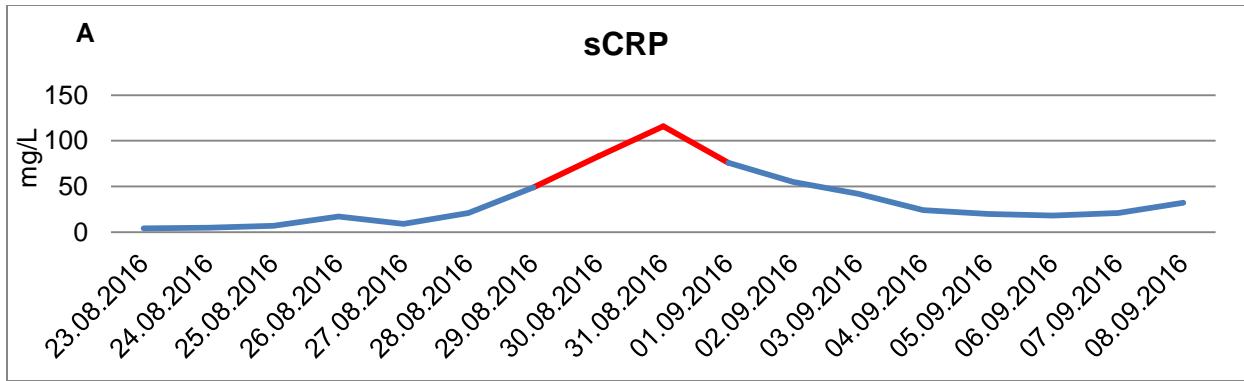

25

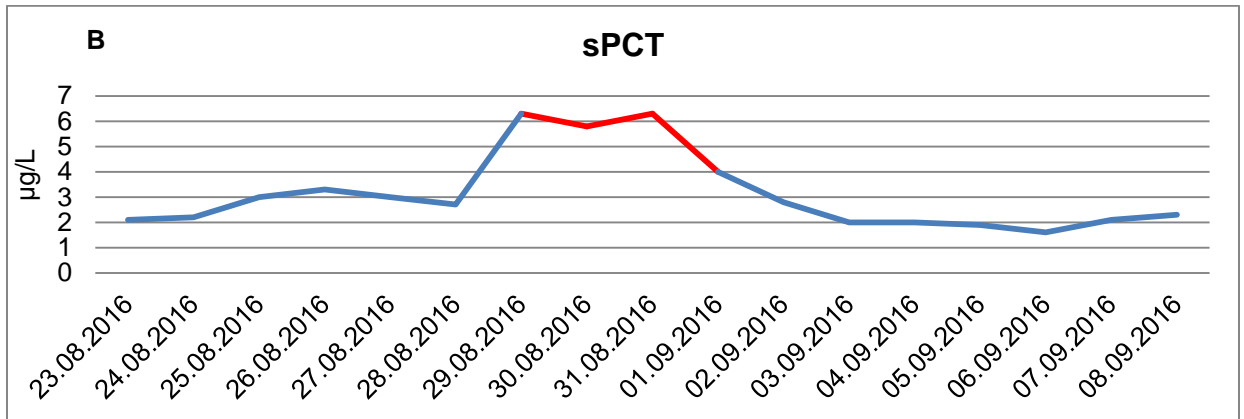

26

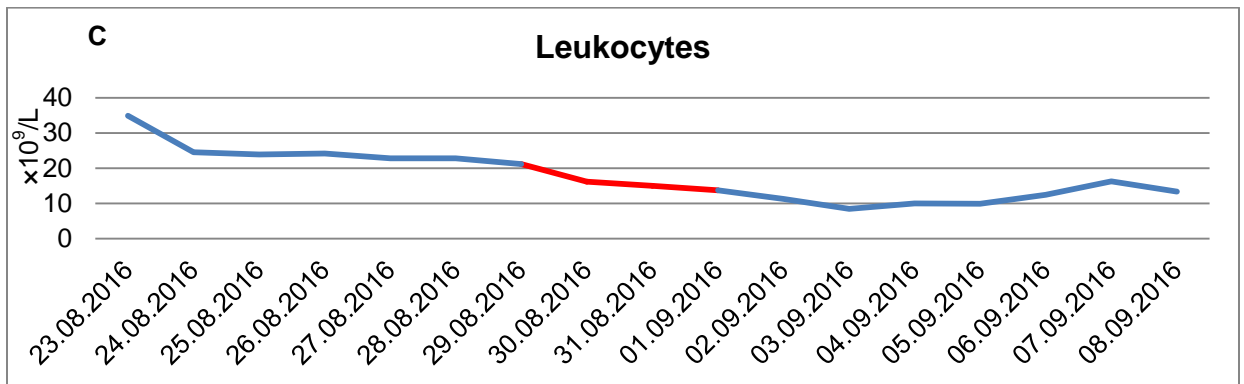

27

28

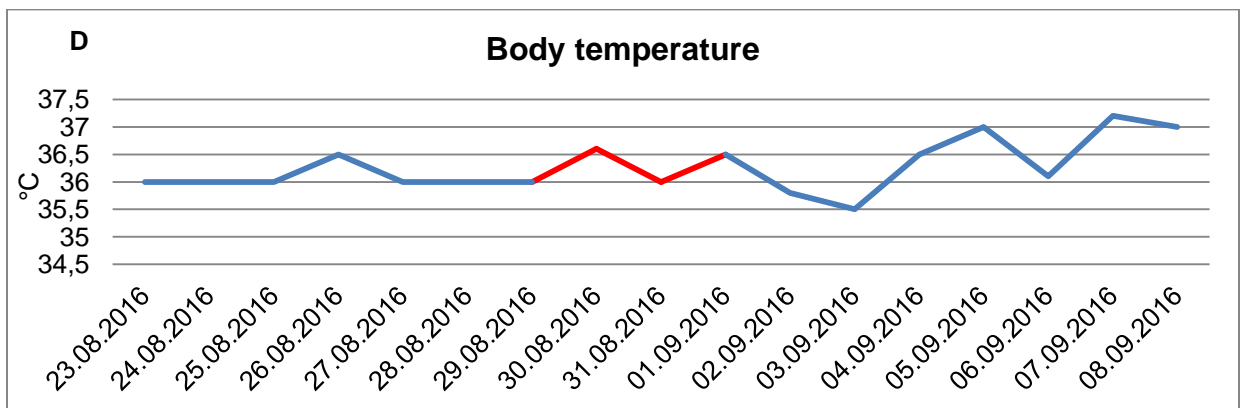

Supplementary Figure S2 – Patient 2

## 29 Supplementary Table S3 - Patient 3

| Date       | sCRP<br>(mg/L) | Leukocytes<br>( $\times 10^9/L$ ) | Body temperature<br>( $^{\circ}C$ ) | sPCT<br>( $\mu g/L$ ) |
|------------|----------------|-----------------------------------|-------------------------------------|-----------------------|
| 19.12.2016 |                |                                   |                                     | 1.1                   |
| 23.12.2016 | 183.8          | 6.00                              | 36.6                                |                       |
| 24.12.2016 | 96.2           | 6.30                              | 36.7                                |                       |
| 25.12.2016 | 72.9           |                                   | 37                                  |                       |
| 26.12.2016 | 69.4           |                                   | 36.6                                |                       |
| 30.12.2016 | 47.3           | 5.50                              | 36.7                                |                       |
| 31.12.2016 | 50.6           | 5.20                              | 36.2                                | 0.2                   |
| 01.01.2017 | 32.8           | 5.00                              | 36.8                                |                       |
| 02.01.2017 | 42.5           | 5.3                               | 36.6                                |                       |
| 03.01.2017 | 40.9           | 5.1                               | 36.6                                |                       |
| 04.01.2017 | 33.6           | 4.7                               | 36.5                                |                       |
| 05.01.2017 | 31.6           | 4.7                               | 36.6                                |                       |
| 06.01.2017 | 26.6           | 4.2                               | 36.6                                |                       |
| 08.01.2017 | 67.7           | 6.2                               | 37.8                                |                       |
| 09.01.2017 | 141.9          | 5.5                               | 37.2                                |                       |
| 10.01.2017 | 137.9          | 4.6                               | 37                                  |                       |
| 12.01.2017 | 39.2           | 4.5                               | 36.5                                | 0.1                   |
| 13.01.2017 | 35.3           |                                   | 36.2                                |                       |
| 16.01.2017 | 22.1           | 7.7                               | 36.7                                |                       |
| 18.01.2017 | 18             | 6.3                               | 36.9                                |                       |

30  Red color shows days of phage therapy

31

32

33

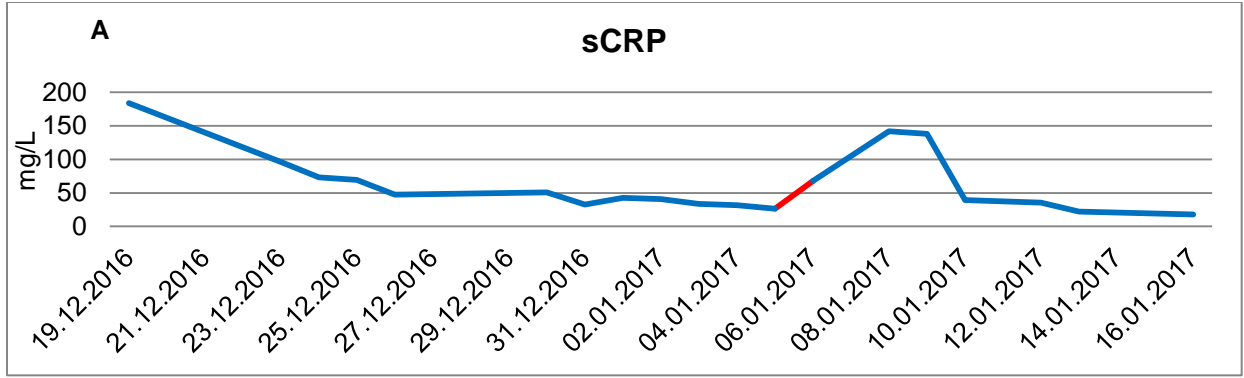

34

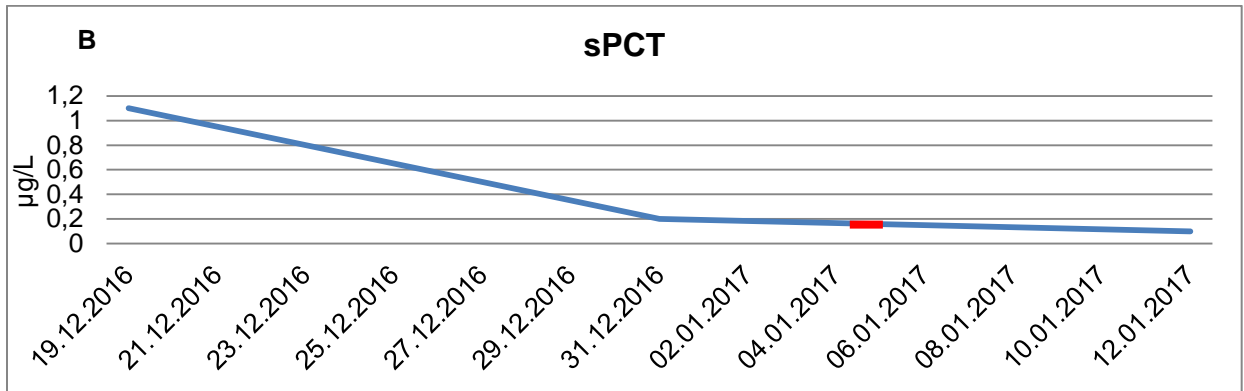

35

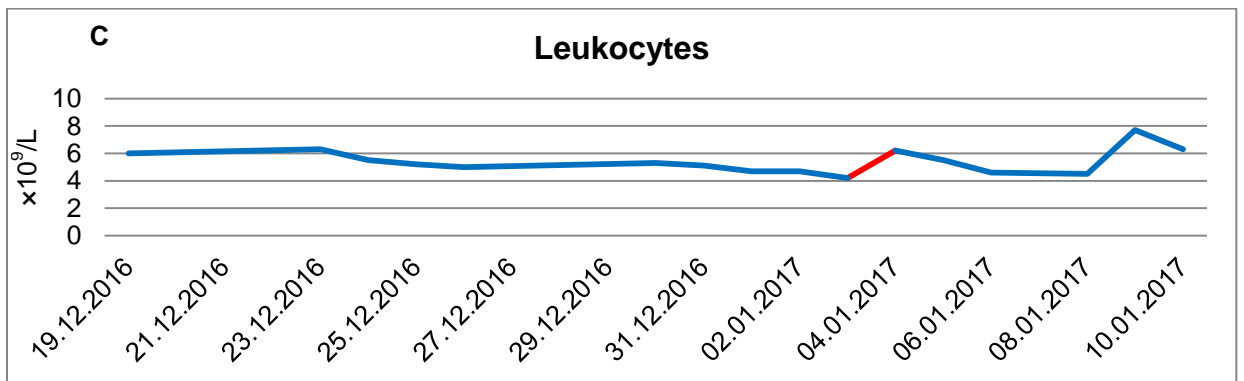

36  
37

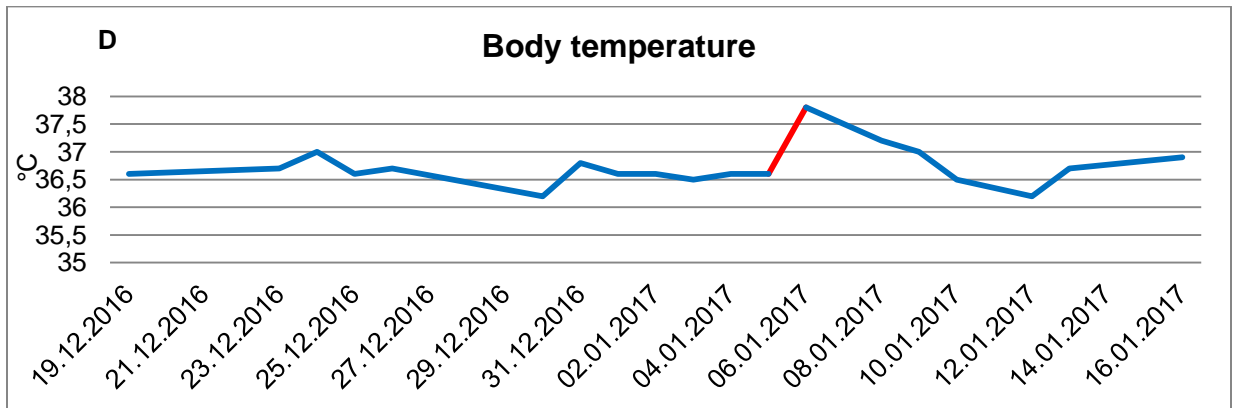

Supplementary Figure S3 – Patient 3

## 38 Supplementary Table S4 - Patient 4

| Date       | sCRP<br>(mg/L) | Leukocytes<br>( $\times 10^9/L$ ) | Body temperature<br>( $^{\circ}C$ ) | sPCT<br>( $\mu g/L$ ) |
|------------|----------------|-----------------------------------|-------------------------------------|-----------------------|
| 19.06.2017 | 267.8          | 7.70                              | 39.3                                | 2.8                   |
| 20.06.2017 |                | 6.10                              | 38.3                                |                       |
| 21.06.2017 | 169.7          | 6.40                              | 38                                  | 1                     |
| 22.06.2017 | 164.9          | 5.40                              |                                     |                       |
| 23.06.2017 | 118.2          | 4.50                              | 37.3                                |                       |
| 24.06.2017 | 107.2          | 5.30                              | 36.4                                | 0.3                   |
| 25.06.2017 | 78.1           | 7.20                              | 37                                  |                       |
| 26.06.2017 | 64.1           | 10.30                             | 37.3                                | 0.1                   |
| 27.06.2017 | 63.7           | 11.40                             | 36.5                                |                       |
| 28.06.2017 | 56.2           | 10.50                             | 36.6                                |                       |
| 29.06.2017 | 42.3           | 21.60                             | 36.5                                |                       |
| 30.06.2017 | 62.4           | 15.30                             | 36.7                                | 0.1                   |
| 01.07.2017 |                | 11.60                             | 36.5                                | 0.1                   |
| 02.07.2017 | 81.1           | 11.00                             | 36.6                                |                       |
| 03.07.2017 | 54.6           | 10.50                             | 36.1                                |                       |
| 04.07.2017 |                | 9.40                              | 36.4                                |                       |
| 05.07.2017 | 43.1           | 8.50                              | 36.5                                |                       |
| 06.07.2017 |                |                                   | 36                                  |                       |
| 07.07.2017 | 39.9           | 8.70                              | 37.1                                |                       |
| 08.07.2017 |                |                                   | 37.1                                |                       |
| 09.07.2017 |                |                                   | 36.1                                |                       |
| 10.07.2017 | 32.9           | 7.4                               | 36.5                                |                       |
| 11.07.2017 |                |                                   | 36.3                                |                       |
| 12.07.2017 | 29             | 7.8                               | 36.6                                |                       |
| 13.07.2017 |                |                                   | 36.6                                |                       |
| 14.07.2017 | 37.3           | 6.8                               | 36.5                                |                       |
| 15.07.2017 |                |                                   | 36.5                                |                       |
| 16.07.2017 |                |                                   | 36.8                                |                       |
| 17.07.2017 | 24             | 7.4                               | 36.2                                |                       |
| 18.07.2017 |                |                                   | 36.7                                |                       |
| 19.07.2017 | 24.4           | 7.7                               | 36.7                                |                       |
| 20.07.2017 |                |                                   | 36.2                                |                       |
| 21.07.2017 | 38.6           | 9.6                               | 37                                  |                       |
| 22.07.2017 |                |                                   | 37.5                                |                       |
| 23.07.2017 | 46.5           | 9.3                               | 36.6                                |                       |
| 24.07.2017 | 43.4           | 8.9                               | 36.1                                |                       |
| 25.07.2017 |                |                                   | 36.7                                |                       |
| 26.07.2017 |                |                                   | 37                                  |                       |
| 27.07.2017 | 18.2           | 8.6                               | 37                                  |                       |
| 28.07.2017 | 15.1           | 8                                 | 37.1                                |                       |



| Date       | sCRP<br>(mg/L) | Leukocytes<br>( $\times 10^9/L$ ) | Body temperature<br>( $^{\circ}C$ ) | sPCT<br>( $\mu g/L$ ) |
|------------|----------------|-----------------------------------|-------------------------------------|-----------------------|
| 29.07.2017 |                |                                   | 37                                  |                       |
| 14.08.2017 | 16.1           | 8.3                               |                                     |                       |
| 22.08.2017 | 9.9            | 6.5                               |                                     |                       |

39  Red color shows days of phage therapy

40

41

42

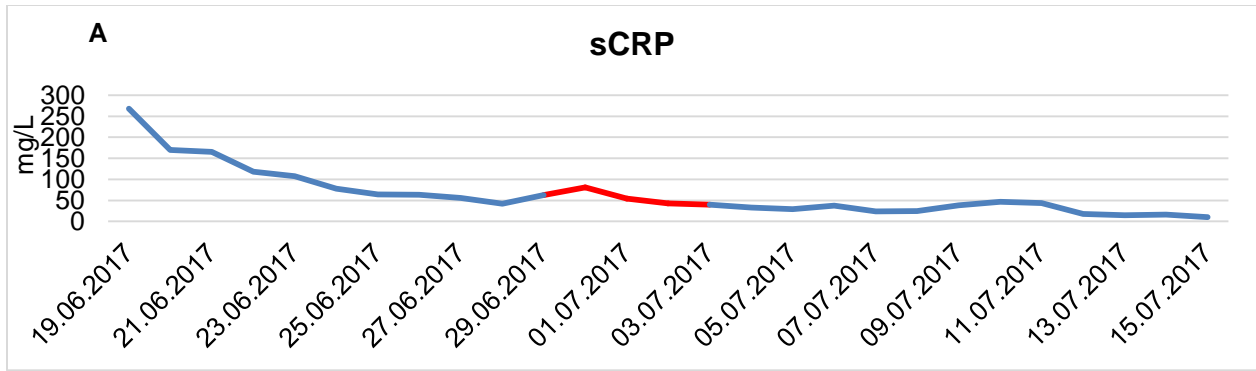

43

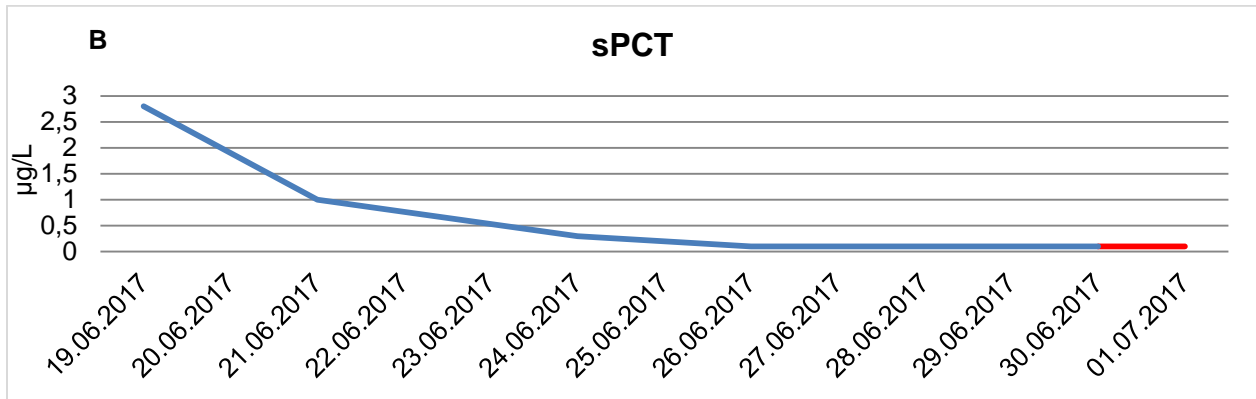

44

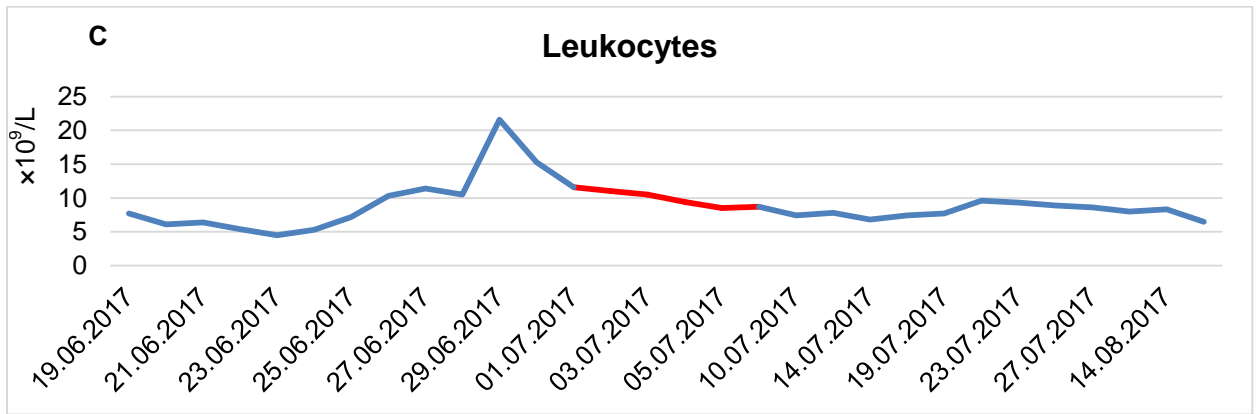

45

46

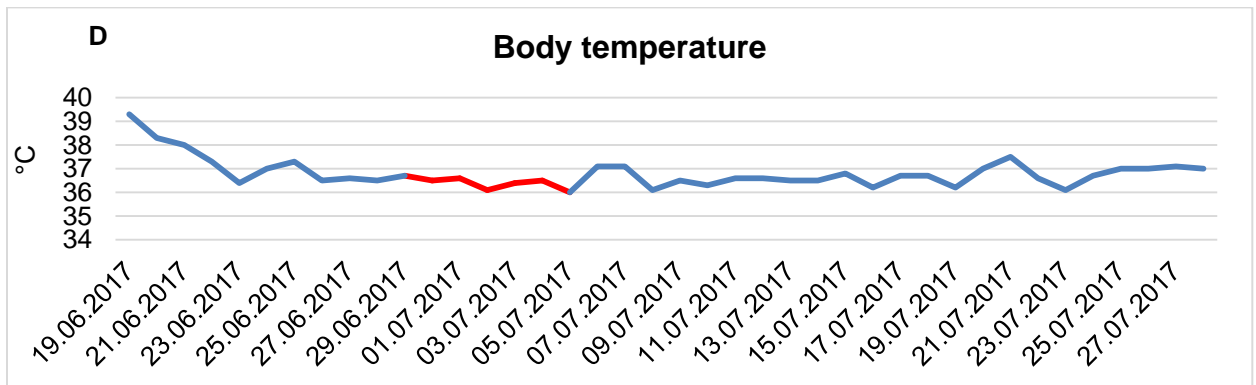

Supplementary Figure S4 – Patient 4

47 Supplementary Table S5 - Patient 5

| Date       | sCRP (mg/L) | Leukocytes ( $\times 10^9/L$ ) | Body temperature ( $^{\circ}C$ ) | sPCT ( $\mu g/L$ ) |
|------------|-------------|--------------------------------|----------------------------------|--------------------|
| 01.08.2017 | 47.3        | 10.5                           | 37.8                             |                    |
| 02.08.2017 | 56.1        | 14.9                           | 37.3                             |                    |
| 03.08.2017 | 84.9        | 16.6                           | 36.6                             | 1.4                |
| 04.08.2017 | 78.4        | 11.3                           | 36.4                             | 1.2                |
| 05.08.2017 | 53.6        | 8.7                            | 35.8                             |                    |
| 06.08.2017 | 42.7        | 8.1                            | 36.6                             |                    |
| 07.08.2017 | 32.8        | 6.8                            | 35.8                             |                    |
| 08.08.2017 | 29.8        | 8.3                            | 36.5                             |                    |
| 09.08.2017 | 23.2        | 8.3                            | 35.7                             |                    |
| 10.08.2017 | 19          | 8.2                            | 35.5                             | 0.2                |
| 11.08.2017 | 18.1        | 6.8                            | 36.1                             | 0.2                |
| 12.08.2017 | 18.6        | 5.4                            | 36                               |                    |
| 13.08.2017 | 20.8        | 6.6                            | 35.8                             | 0.3                |
| 14.08.2017 | 22.4        | 6.7                            | 35.8                             |                    |
| 15.08.2017 | 23          | 7.7                            | 36.8                             |                    |
| 16.08.2017 | 27          | 7.5                            | 35                               | 0.3                |
| 17.08.2017 | 33.2        | 7.6                            | 36.6                             | 0.4                |
| 18.08.2017 | 40          | 7.4                            | 36                               |                    |
| 19.08.2017 | 40.5        | 7                              | 36.6                             | 0.5                |
| 20.08.2017 | 37.2        | 6.5                            | 36.2                             | 0.6                |
| 21.08.2017 | 38.3        | 6.1                            | 36.7                             | 1                  |
| 22.08.2017 | 40.9        | 7.7                            |                                  |                    |
| 23.08.2017 | 36.2        | 6.5                            | 35.7                             |                    |
| 24.08.2017 | 35.3        | 7.8                            | 36.7                             |                    |
| 25.08.2017 | 36.5        | 8.3                            | 36.9                             |                    |
| 26.08.2017 | 52.5        | 9.2                            | 36.4                             |                    |
| 27.08.2017 | 61.4        | 9.1                            | 36.5                             |                    |
| 28.08.2017 | 56.3        | 9.4                            | 36.5                             |                    |
| 29.08.2017 | 46.5        | 9.1                            | 36.8                             |                    |
| 30.08.2017 |             |                                | 35.9                             |                    |
| 31.08.2017 | 48.2        | 10.2                           | 36.1                             |                    |

48  Red color shows days of phage therapy

49

50

51

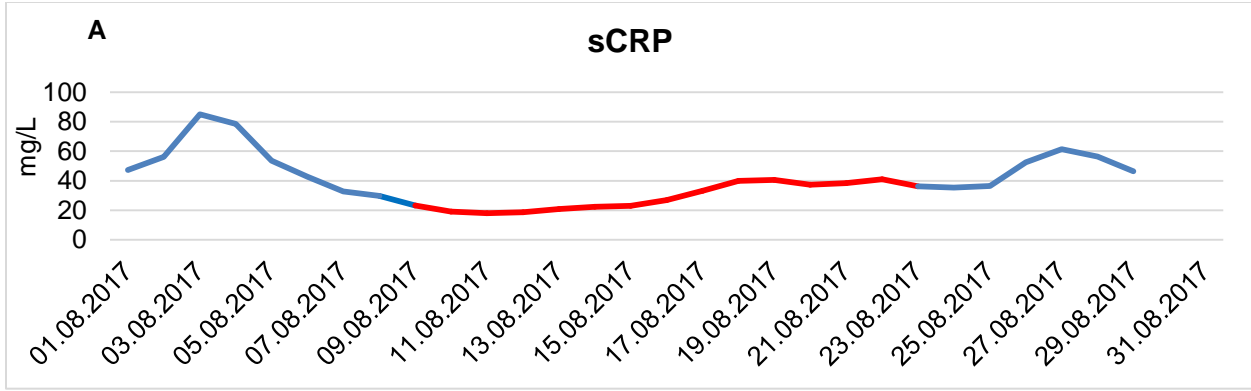

52

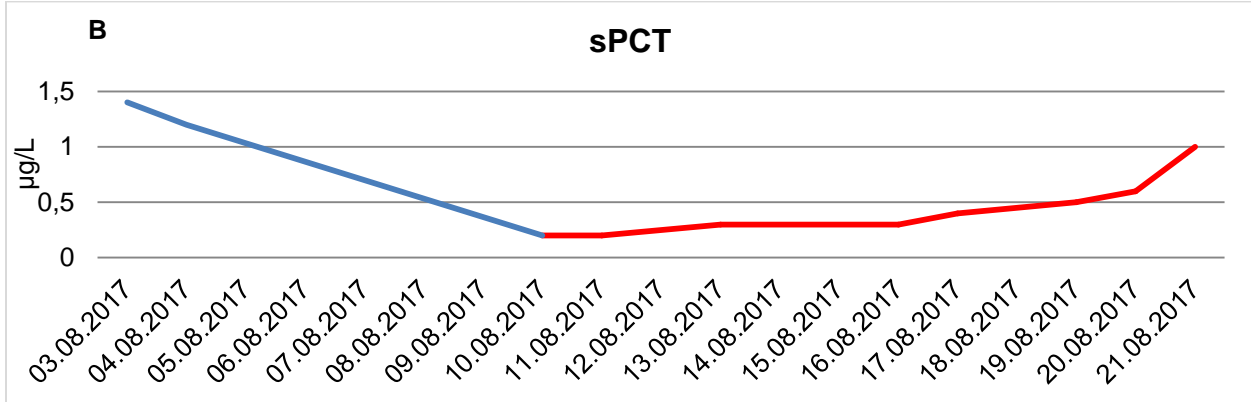

53

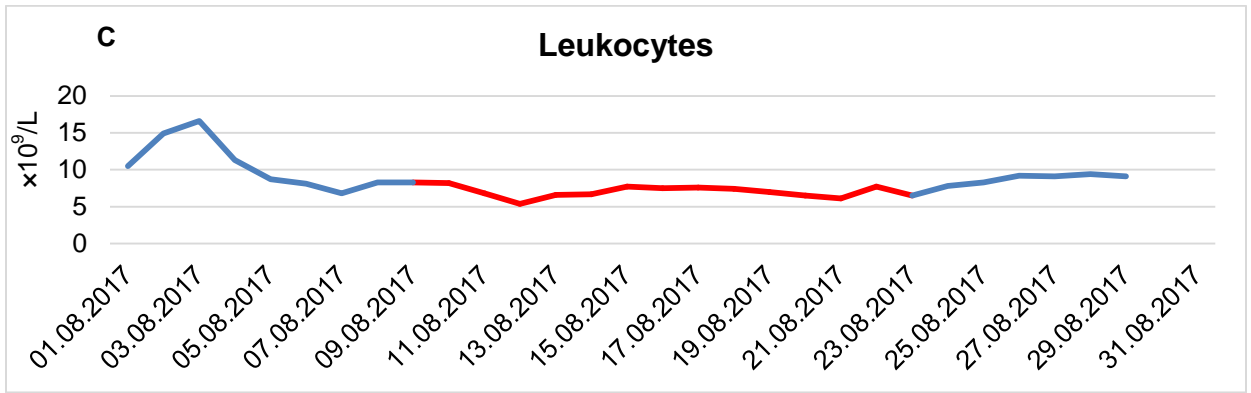

54

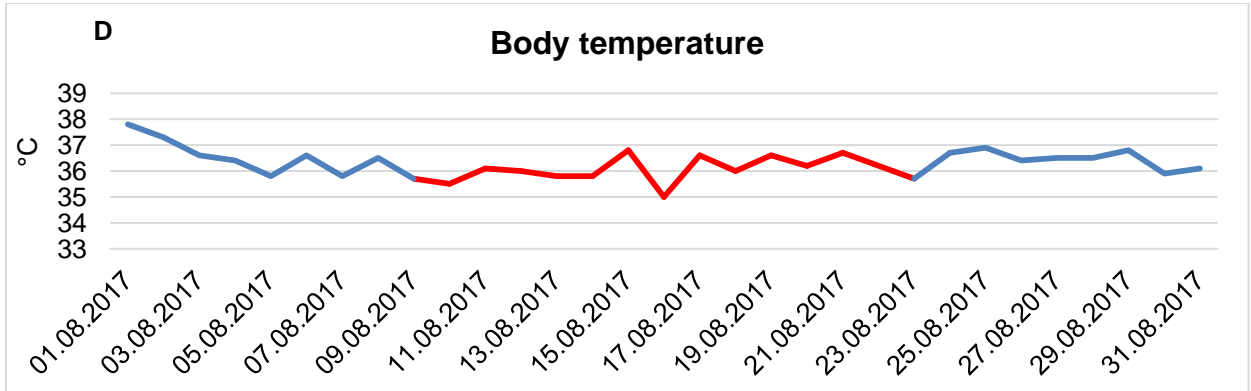

55

Supplementary Figure S5 – Patient 5

56 Supplementary Table S6 - Patient 6

| Date       | sCRP<br>(mg/L) | Leukocytes<br>( $\times 10^9/L$ ) | Body temperature<br>( $^{\circ}C$ ) | sPCT<br>( $\mu g/L$ ) |
|------------|----------------|-----------------------------------|-------------------------------------|-----------------------|
| 11.11.2017 | 4              | 6.7                               |                                     |                       |
| 12.11.2017 |                |                                   |                                     |                       |
| 13.11.2017 |                |                                   |                                     |                       |
| 14.11.2017 |                |                                   |                                     |                       |
| 15.11.2017 |                |                                   |                                     |                       |
| 16.11.2017 | 78.9           | 11.3                              | 39.4                                | 0.3                   |
| 17.11.2017 | 189.9          | 11                                | 38.3                                |                       |
| 18.11.2017 |                |                                   | 36.4                                |                       |
| 19.11.2017 |                |                                   | 35.6                                |                       |
| 20.11.2017 | 37.6           | 6.9                               | 36.3                                |                       |
| 21.11.2017 |                |                                   | 36.5                                |                       |
| 22.11.2017 |                |                                   | 36.4                                |                       |
| 23.11.2017 | 10.4           | 6.2                               | 36.2                                |                       |
| 24.11.2017 |                |                                   | 35.4                                |                       |
| 25.11.2017 |                |                                   | 36                                  |                       |
| 26.11.2017 | 6.8            | 5.5                               |                                     | <0.1                  |
| 27.11.2017 | 6              | 6.1                               |                                     | <0.1                  |
| 28.11.2017 |                |                                   | 36.1                                |                       |
| 29.11.2017 |                |                                   | 36.5                                |                       |
| 30.11.2017 | 13.1           | 8.9                               | 37.4                                |                       |
| 01.12.2017 |                |                                   | 36.6                                |                       |
| 02.12.2017 | 37.4           | 7.2                               | 36.4                                |                       |
| 03.12.2017 |                |                                   | 35.9                                |                       |
| 04.12.2017 | 15.2           | 7.8                               | 36.6                                |                       |
| 05.12.2017 |                |                                   | 36.6                                |                       |
| 06.12.2017 |                |                                   |                                     |                       |
| 07.12.2017 |                |                                   |                                     |                       |
| 08.12.2017 |                |                                   |                                     |                       |
| 09.12.2017 |                |                                   |                                     |                       |
| 10.12.2017 |                |                                   |                                     |                       |
| 11.12.2017 |                |                                   |                                     |                       |
| 12.12.2017 |                |                                   |                                     |                       |
| 13.12.2017 |                |                                   |                                     |                       |
| 14.12.2017 |                |                                   |                                     |                       |
| 15.12.2017 |                |                                   |                                     |                       |
| 16.12.2017 |                |                                   |                                     |                       |
| 17.12.2017 |                |                                   |                                     |                       |
| 18.12.2017 | 3.2            | 8.1                               |                                     |                       |

57  Red color shows days of phage therapy

58

59

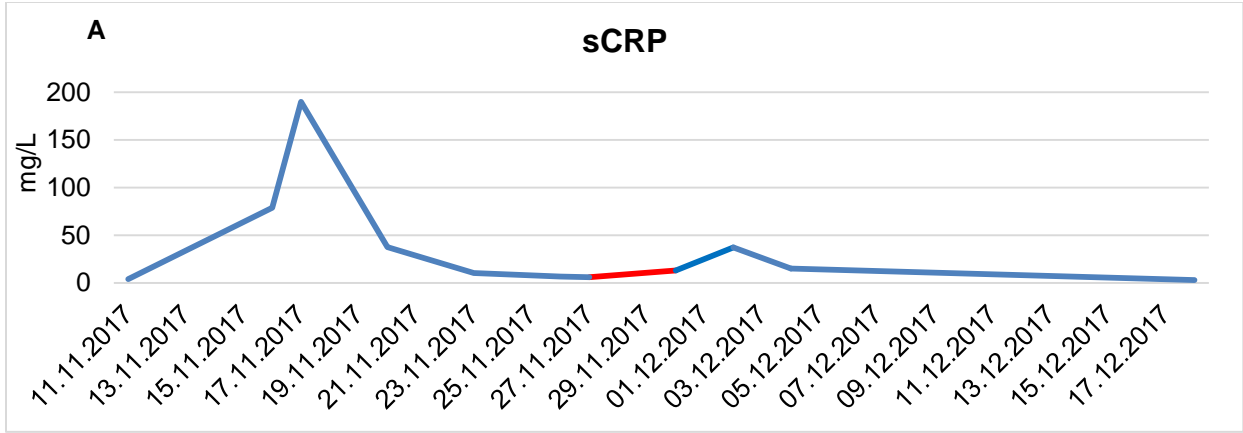

60

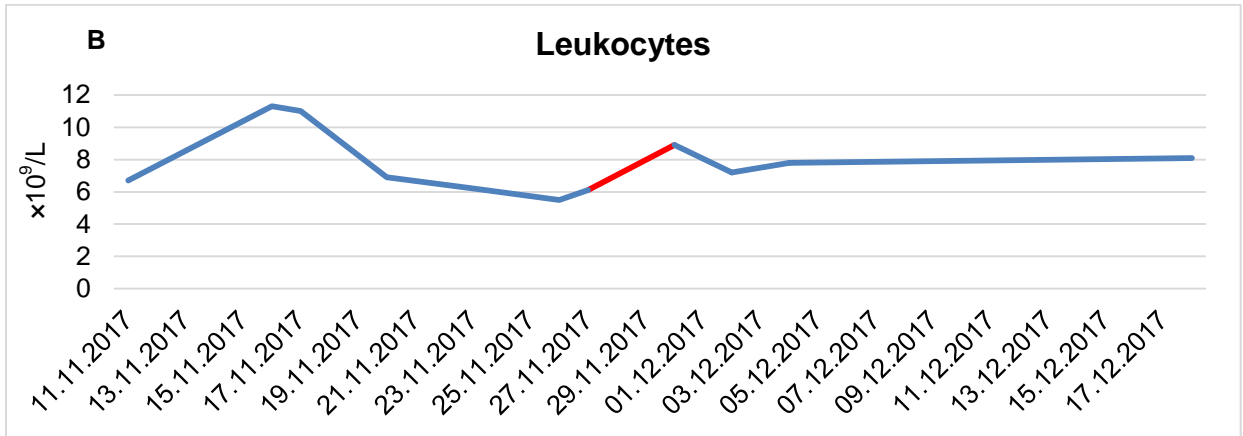

61

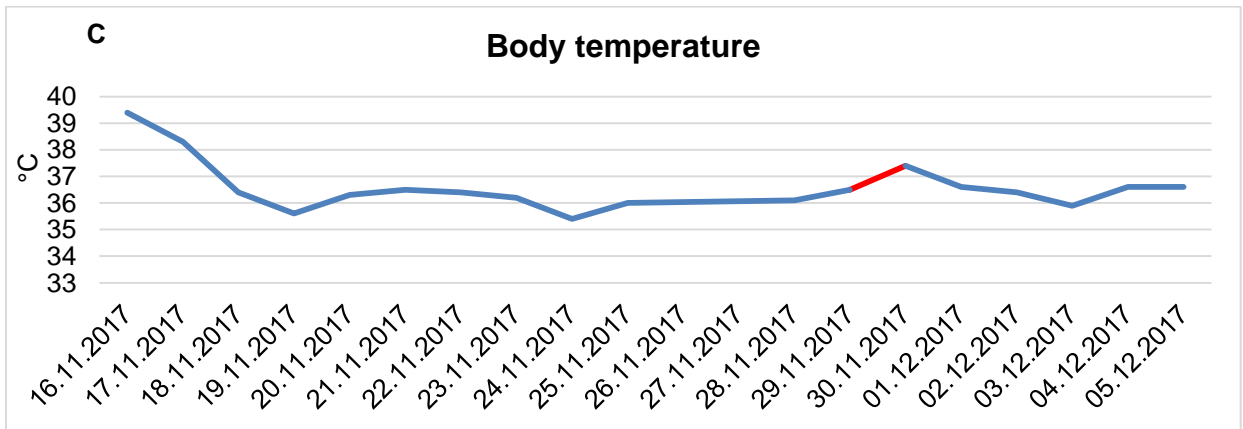

62

Supplementary Figure S6 – Patient 6

## 63 Supplementary Table S7 - Patient 7

| Date       | sCRP<br>(mg/L) | Leukocytes<br>( $\times 10^9/L$ ) | Body temperature<br>( $^{\circ}C$ ) | sPCT<br>( $\mu g/L$ ) |
|------------|----------------|-----------------------------------|-------------------------------------|-----------------------|
| 20.04.2018 | 304.8          | 9.8                               |                                     |                       |
| 21.04.2018 | 265.8          | 6.5                               | 37                                  |                       |
| 22.04.2018 | 208.4          | 5.7                               | 36.8                                |                       |
| 23.04.2018 |                |                                   |                                     |                       |
| 24.04.2018 | 120.1          | 7.7                               | 36.6                                |                       |
| 25.04.2018 |                |                                   | 36.5                                |                       |
| 26.04.2018 |                |                                   | 36.6                                |                       |
| 27.04.2018 | 86.2           | 11.1                              |                                     |                       |
| 28.04.2018 |                | 10.3                              | 37.1                                |                       |
| 29.04.2018 |                |                                   | 36.6                                |                       |
| 30.04.2018 | 79.4           | 12.3                              |                                     |                       |
| 01.05.2018 |                |                                   | 36.2                                |                       |
| 02.05.2018 |                | 9.1                               | 36.3                                |                       |
| 03.05.2018 | 62.2           | 8.9                               |                                     |                       |
| 04.05.2018 |                |                                   | 36.3                                |                       |
| 05.05.2018 | 74.8           | 8                                 | 36.6                                |                       |
| 06.05.2018 | 45.1           | 6.7                               |                                     |                       |
| 07.05.2018 | 40.9           | 6.9                               | 36.2                                |                       |
| 08.05.2018 |                |                                   | 36.1                                |                       |
| 09.05.2018 | 31.9           | 7.9                               |                                     |                       |
| 10.05.2018 | 35.2           | 10                                |                                     |                       |
| 11.05.2018 | 176.3          | 9                                 | 37                                  |                       |
| 12.05.2018 |                | 8.8                               | 36.4                                |                       |
| 13.05.2018 |                | 8.6                               | 36                                  |                       |
| 14.05.2018 | 82.8           | 10.7                              | 36                                  |                       |
| 15.05.2018 | 59.6           | 8.7                               |                                     |                       |
| 16.05.2018 | 34.5           | 7.1                               | 36.3                                |                       |
| 17.05.2018 | 28             | 7.4                               |                                     |                       |
| 18.05.2018 | 29.6           | 8                                 | 35.9                                |                       |
| 19.05.2018 |                |                                   |                                     |                       |
| 20.05.2018 |                |                                   | 36.3                                |                       |
| 21.05.2018 | 22.8           | 9.2                               | 36.1                                |                       |
| 22.05.2018 |                | 10                                | 36.2                                |                       |
| 23.05.2018 | 21.5           | 9.5                               | 36.1                                |                       |
| 24.05.2018 | 24.1           | 9.6                               | 35.8                                |                       |
| 25.05.2018 | 24.5           | 9.2                               | 36.5                                |                       |

64  Red color shows days of phage therapy

65

66

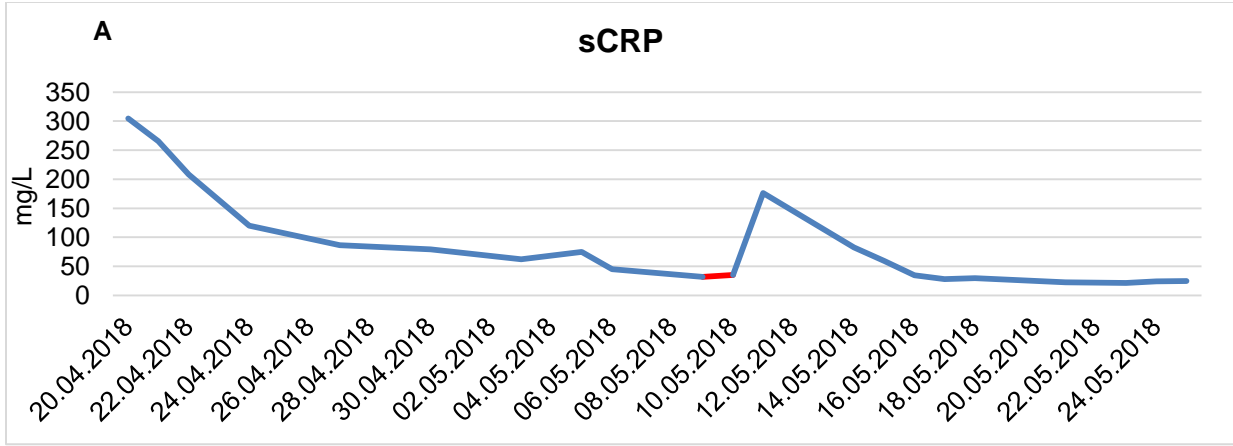

67

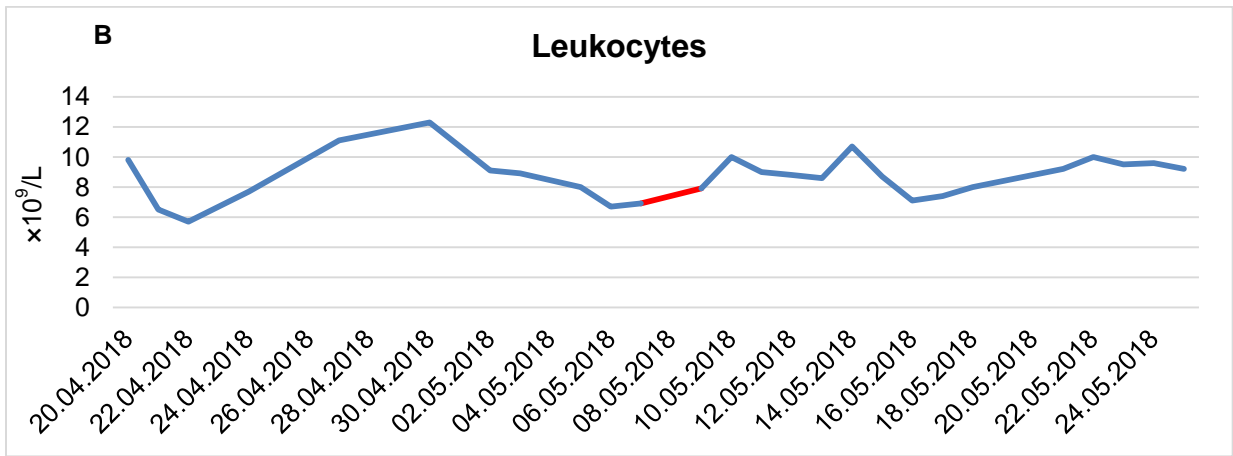

68

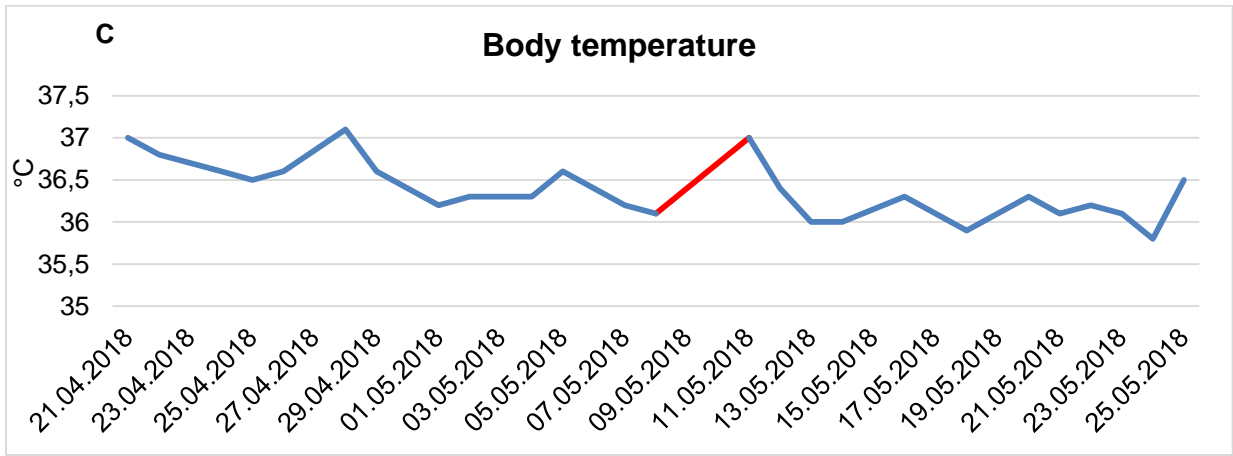

69

Supplementary Figure S7 – Patient 7



## 70 Supplementary Table S8 - Patient 8

| Date       | sCRP<br>(mg/L) | Leukocytes<br>( $\times 10^9/L$ ) | Body temperature<br>( $^{\circ}C$ ) | sPCT<br>( $\mu g/L$ ) |
|------------|----------------|-----------------------------------|-------------------------------------|-----------------------|
| 24.05.2018 | 50.7           | 5.8                               | 37.3                                |                       |
| 25.05.2018 | 117.2          | 5.8                               | 37                                  | <0.1                  |
| 26.05.2018 | 113.4          | 4.8                               | 37.2                                | <0.1                  |
| 27.05.2018 |                |                                   | 37.5                                |                       |
| 28.05.2018 |                | 4.2                               | 36.3                                |                       |
| 29.05.2018 |                |                                   | 36.6                                |                       |
| 30.05.2018 | 55.7           | 3.2                               | 36.2                                |                       |
| 31.05.2018 | 20.3           | 2.8                               | 36.6                                |                       |
| 01.06.2018 | 11.6           | 3.3                               | 36.3                                |                       |
| 02.06.2018 |                |                                   | 36.6                                |                       |
| 03.06.2018 | 4.3            | 3.5                               | 36.3                                |                       |
| 04.06.2018 |                |                                   | 36.5                                |                       |
| 05.06.2018 | 1.7            | 3.5                               | 36.5                                |                       |
| 06.06.2018 |                |                                   | 36.2                                |                       |
| 07.06.2018 |                |                                   | 36.8                                |                       |
| 08.06.2018 | 0.4            | 3.4                               | 36.4                                |                       |
| 09.06.2018 |                |                                   | 36.2                                |                       |
| 10.06.2018 | 0.4            | 3.5                               | 36.4                                |                       |
| 11.06.2018 |                |                                   | 36.4                                |                       |
| 12.06.2018 |                |                                   | 35.8                                |                       |
| 13.06.2018 |                |                                   | 35.7                                |                       |
| 14.06.2018 | 0.7            | 3.5                               | 36.7                                |                       |
| 15.06.2018 | 1.1            | 3.9                               | 36.2                                |                       |
| 28.06.2018 |                |                                   | 36.4                                |                       |
| 29.06.2018 | 0.4            | 4.2                               | 36.5                                |                       |

71  Red color shows days of phage therapy

72

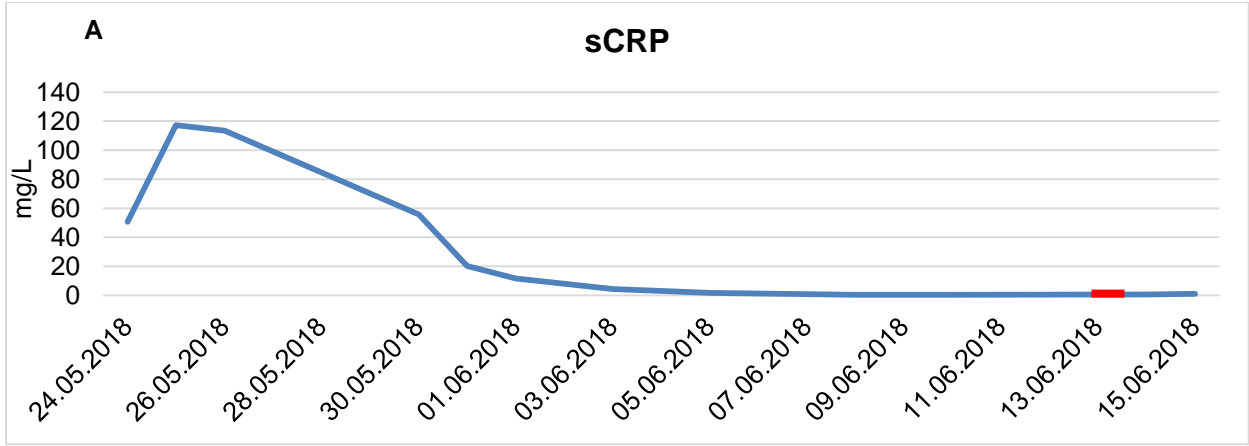

73

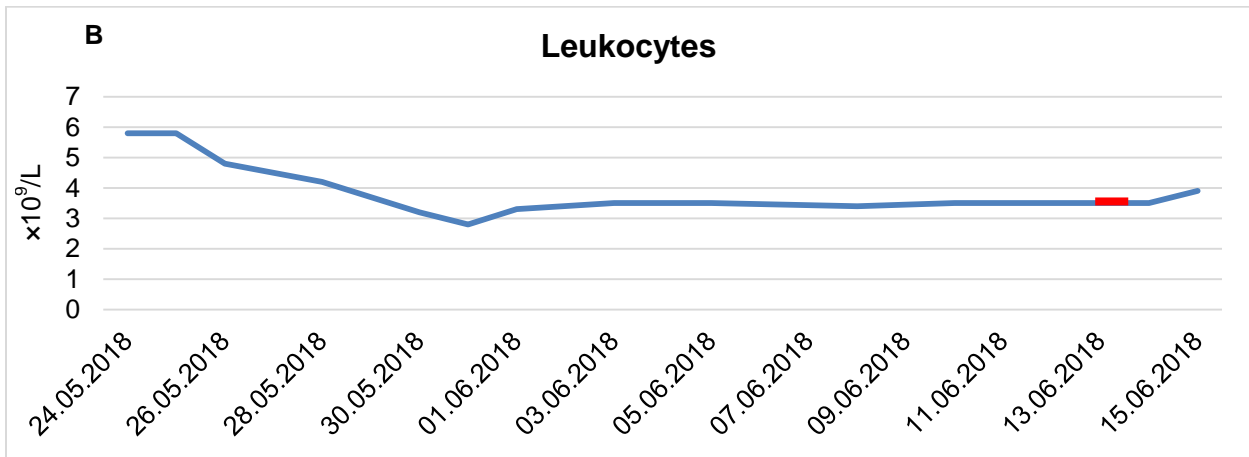

74

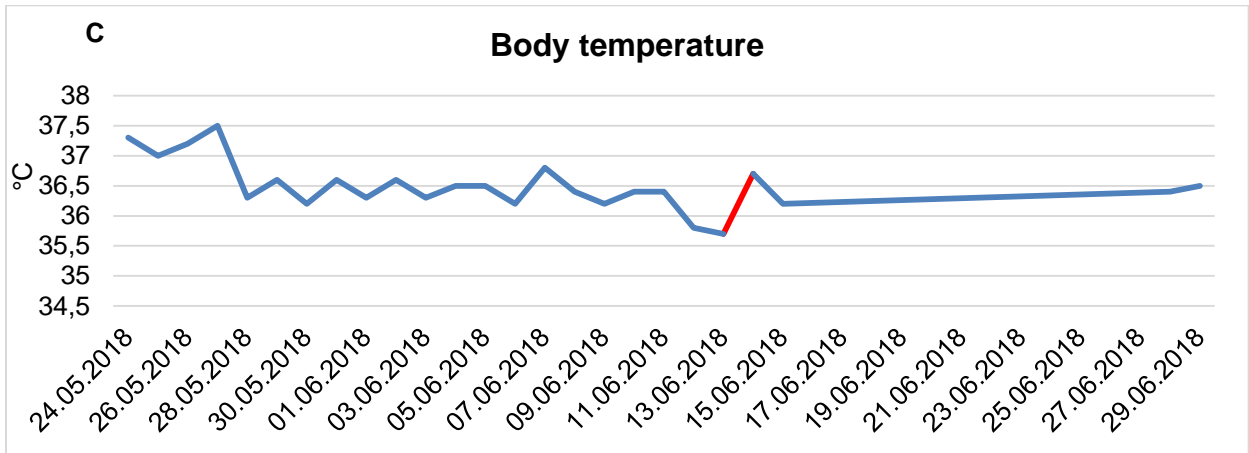

75

76

77

Supplementary Figure S8 – Patient 8

A

|                          | [1]       |
|--------------------------|-----------|
| Ampicillin               | R >=32.0  |
| Ampicillin-Sulbactam     | R >=32.0  |
| Piperacillin / Sulbactam | R         |
| Piperacillin-Tazobactam  | R >=128.0 |
| Cefuroxim                | R >=64.0  |
| Cefuroxim-Axetil         | R >=64.0  |
| Ceftriaxon               | R         |
| Cefotaxim                | R >=64.0  |
| Ceftazidim               | R >=64.0  |
| Gentamicin               | R >=16.0  |
| Doxycycline              | R         |
| Tetracyclin              | R >=16.0  |
| Levofloxacin             | R         |
| Ciprofloxacin            | R >=4.0   |
| Moxifloxacin             | R >=8.0   |
| Meropenem                | R >=16.0  |
| Ertapenem                | R >=8.0   |
| Cotrimoxazol             | R >=320.0 |

B

|                          | [1]       | [2]       |
|--------------------------|-----------|-----------|
| Ampicillin               | R >=32.0  | R >=32.0  |
| Ampicillin-Sulbactam     | R >=32.0  | R >=32.0  |
| Piperacillin / Sulbactam | R         | R         |
| Piperacillin-Tazobactam  | R >=128.0 | R         |
| Cefuroxim                | R >=64.0  | R 16.0    |
| Cefuroxim-Axetil         | R >=64.0  | R 16.0    |
| Cefpodoxim               | R >=8.0   | R 2.0     |
| Ceftriaxon               | R         | R         |
| Cefotaxim                | R >=64.0  | R <=1.0   |
| Ceftazidim               | R >=64.0  | R <=1.0   |
| Gentamicin               | R >=16.0  | R >=16.0  |
| Tigecyclin               | R 4.0     | R 4.0     |
| Doxycycline              | R         | R         |
| Tetracyclin              | R >=16.0  | R >=16.0  |
| Levofloxacin             | R         | R         |
| Ciprofloxacin            | R >=4.0   | R >=4.0   |
| Moxifloxacin             | R >=8.0   | R >=8.0   |
| Meropenem                | S <=0.25  | S <=0.25  |
| Ertapenem                | S <=0.5   | S <=0.5   |
| Cotrimoxazol             | R >=320.0 | R >=320.0 |

78  
79  
80

Supplementary Figure S9 – Antibigram from Patient 2: (A) *K. pneumoniae* isolated from lungs prior phage therapy; (B) *K. pneumoniae* isolated from stool after phage therapy
